# Supplementary material for: Synthesis of poly(N-acryloylmorpholine) macromonomers using RAFT and their copolymerization with methacrylic acid for the design of graft copolymer additives for concrete
Source: Royal Society of Chemistry journal article supplement (doi:10.1039/c5py01730k), 2015-12-01
Supplement: c5py01730k1.pdf [file c5py01730k1.pdf]

SUPPORTING INFORMATION

## Synthesis of poly(*N*-acryloylmorpholine) macromonomers using RAFT and their copolymerization with methacrylic acid for the design of graft copolymer additives for concrete.

T. Boursier,<sup>a</sup> S. Georges,<sup>b</sup> M. Mosquet,<sup>b</sup> D. Rinaldi,<sup>b</sup> F. D'Agosto\*

<sup>a</sup>Université de Lyon, Univ. Lyon 1, CPE Lyon, CNRS, UMR 5265, C2P2 (Chemistry, Catalysis, Polymers & Processes), Team LCPP, 69616 Villeurbanne Cedex, France.

<sup>b</sup>Lafarge LCR, 95 Rue De Montmurier BP 15, Saint-Quentin-Fallavier, 38291, France.

### Stability of the potential superplasticizers under concrete formation conditions

As it can be seen on Figure S1, ultracentrifugation of PCPNAM1 allows a clean removing of the unreacted PNAM macromonomer after copolymerization. In addition, the trace of the PCPNAM1 after 3h15 of hydrolysis showed the formation of a species corresponding to hydrolyzed PNAM chains. The degree of hydrolysis was determined by comparing the area of this peak with the area of the peak corresponding to PCPNAM1.

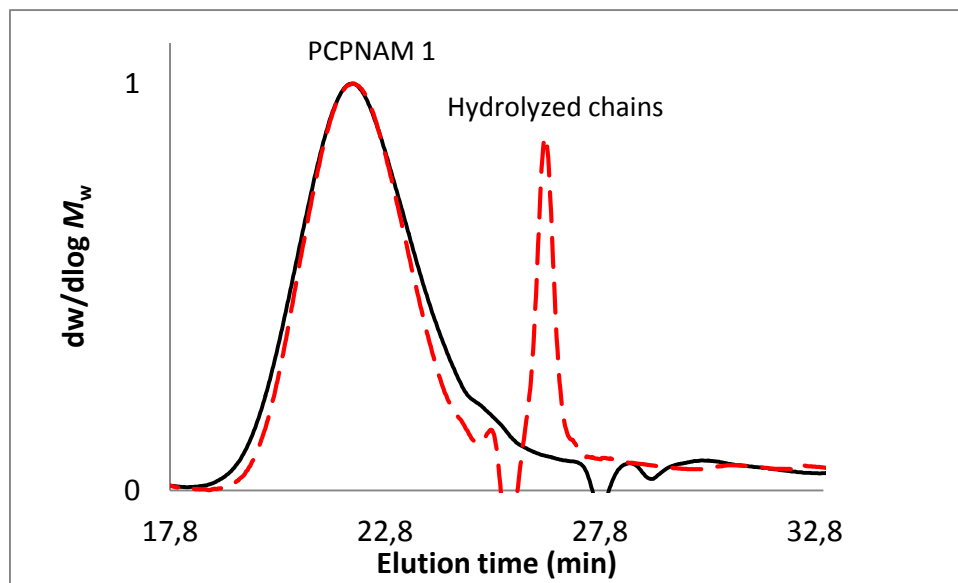

**Figure S1.** Aqueous SEC analyses traces of a PCPNAM1 after ultracentrifugation and analyzed immediately after being dissolved in a saturated lime solution (black line) and of a PCPNAM1 after 3h15 in saturated lime solution (red dashed line).
